# Supplementary material for: Dual color fluorescence quantitative detection of mercury in soil with graphene oxide and dye-labeled nucleic acids
Source: Royal Society of Chemistry journal article supplement (doi:10.1039/c4ay03107e), 2015-01-01
Supplement: c4ay03107e1.pdf [file c4ay03107e1.pdf]

**Supplementary information for**  
**Dual Color Fluorescence Quantitative Detection for Mercury**  
**in Soil with Graphene Oxide and Dye-labeled Nucleic Acids**

Kun Zhai <sup>a,b</sup>, Yonghong Liu <sup>a</sup>, Dongshan Xiang <sup>b</sup>, Guangguang Guo <sup>a</sup>, Tianying Wan <sup>a</sup>,  
Hongqing Hu <sup>a\*</sup>

<sup>a</sup> College of Resources and Environment, Huazhong Agricultural University, Wuhan  
430070, China

<sup>b</sup> School of Chemical and Environmental Engineering, Hubei University for Nationalities,  
Enshi 445000, China

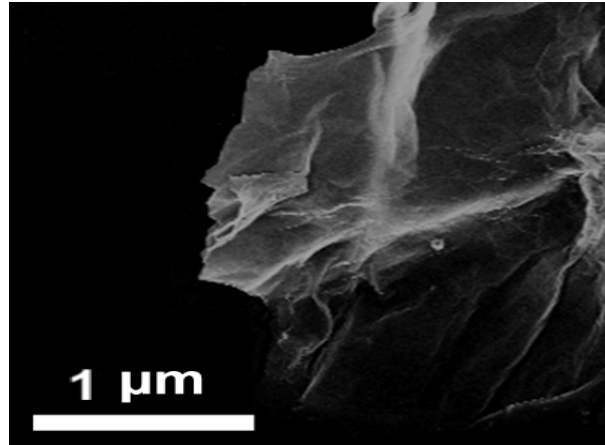

Fig.S1 The image of scanning electron microscopy (SEM) of GO

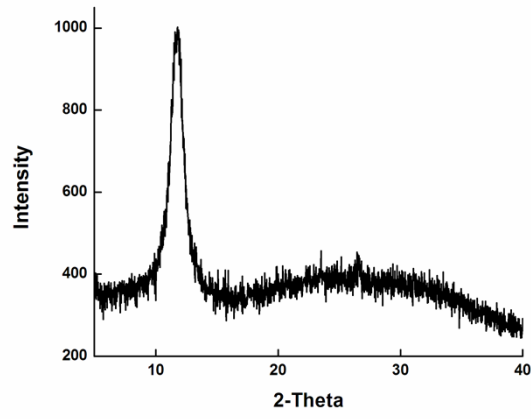

Fig.S2 The X-ray diffraction (XRD) spectrum of GO

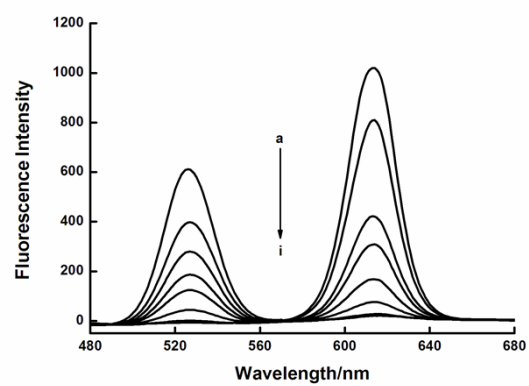

Fig.S3 Fluorescence quenching of free fluorescence probes (P1 and P2,  $4 \times 10^{-8}$  mol·L<sup>-1</sup>) in the presence of GO with a series of concentrations (a→i: 0, 1, 2, 3, 4, 5, 6, 8, 10  $\mu\text{g} \cdot \text{mL}^{-1}$ )

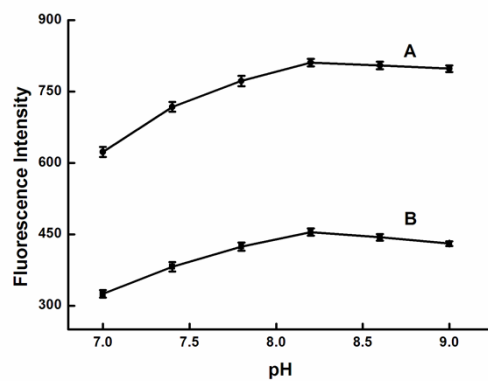

Fig. S4 Effect of different pH on the fluorescence intensity (A-FAM; B-ROX).  
Concentration of fluorescence probes:  $4 \times 10^{-8} \text{ mol} \cdot \text{L}^{-1}$ ; Concentration of  $\text{Hg}^{2+}$ :  $8 \times 10^{-8} \text{ mol} \cdot \text{L}^{-1}$ .

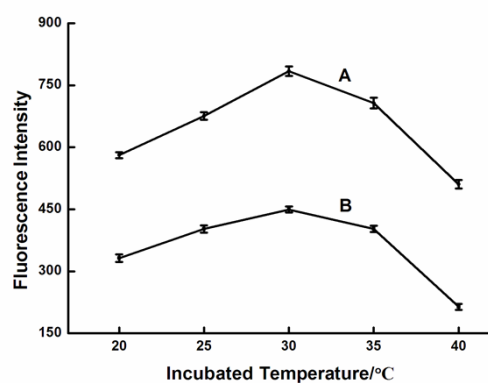

Fig. S5 Effect of different incubated temperature on the fluorescence intensity (A-FAM; B-ROX). Concentration of fluorescence probes:  $4 \times 10^{-8} \text{ mol} \cdot \text{L}^{-1}$ ; Concentration of  $\text{Hg}^{2+}$ :  $8 \times 10^{-8} \text{ mol} \cdot \text{L}^{-1}$ .

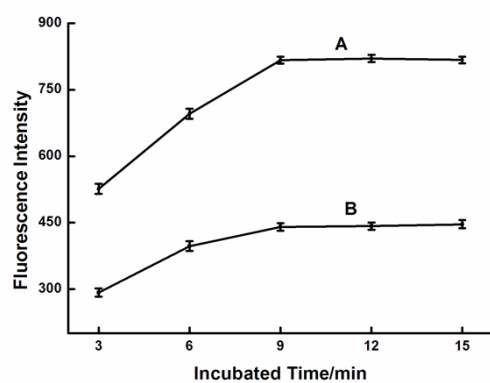

Fig. S6 Effect of different incubated time on the fluorescence intensity (A-FAM; B-ROX). Concentration of fluorescence probes:  $4 \times 10^{-8} \text{ mol} \cdot \text{L}^{-1}$ ; Concentration of  $\text{Hg}^{2+}$ :  $8 \times 10^{-8} \text{ mol} \cdot \text{L}^{-1}$ .

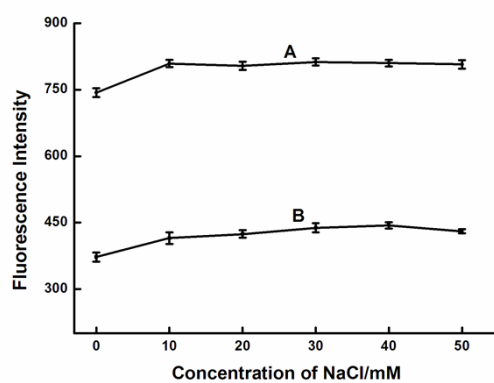

Fig. S7 Effect of different ionic strength of buffer solution on the fluorescence intensity (A-FAM; B-ROX). Concentration of fluorescence probes:  $4 \times 10^{-8} \text{ mol} \cdot \text{L}^{-1}$ ; Concentration of  $\text{Hg}^{2+}$ :  $8 \times 10^{-8} \text{ mol} \cdot \text{L}^{-1}$ .
